# Supplementary material
Source: publisher site journal article supplement (doi:10.18632/aging.206374)
Supplement: Supplementary file 2 [file aging-v18i1-206374-supplementary-material-SD1.pdf]

SUPPLEMENTARY FIGURES

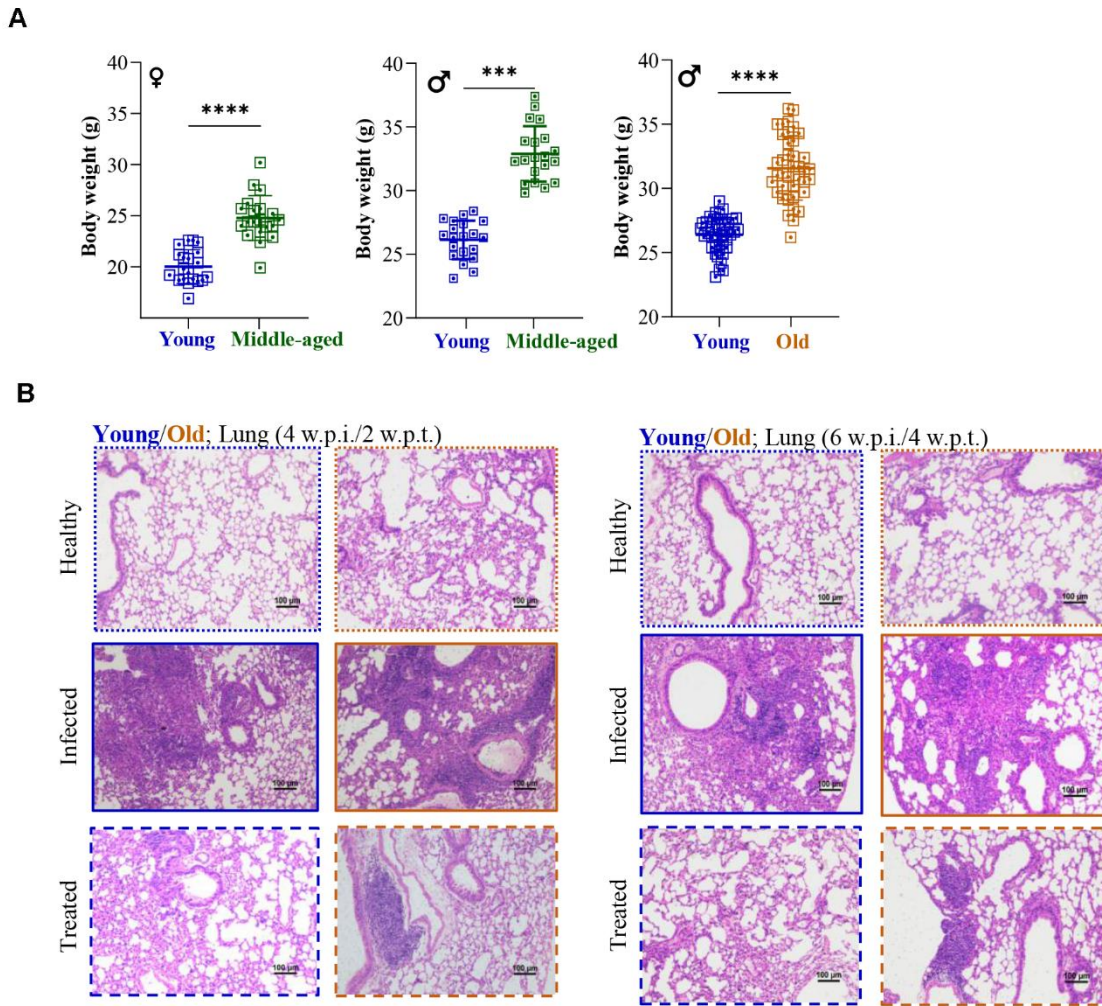

**Supplementary Figure 1. Old C57BL/6 mice receiving two weeks of RIF-INH treatment showed delayed lung *Mtb* clearance.** (A) Body weight (in gram) of mice (n=20/age group for young and middle-aged panels, n=40/age group for young and old panel) prior to infection (day -5). (B) Lung histopathological images (hematoxylin and eosin; H&E stained, 100× magnification, scale bar=100 μm) at 4 w.p.i./2 w.p.t. and 6 w.p.i./4 w.p.t. Young (2-4 months) in blue, middle-aged (9-12 months) in green and old (17-19 months) mice in brown; w.p.i.: weeks post infection; w.p.t.: weeks post treatment; p-values: \*\*\* <0.0005 and \*\*\*\* <0.0001 at 95% confidence interval by Mann-Whitney test. Data shown as mean ± SD. See also Figures 1, 2.

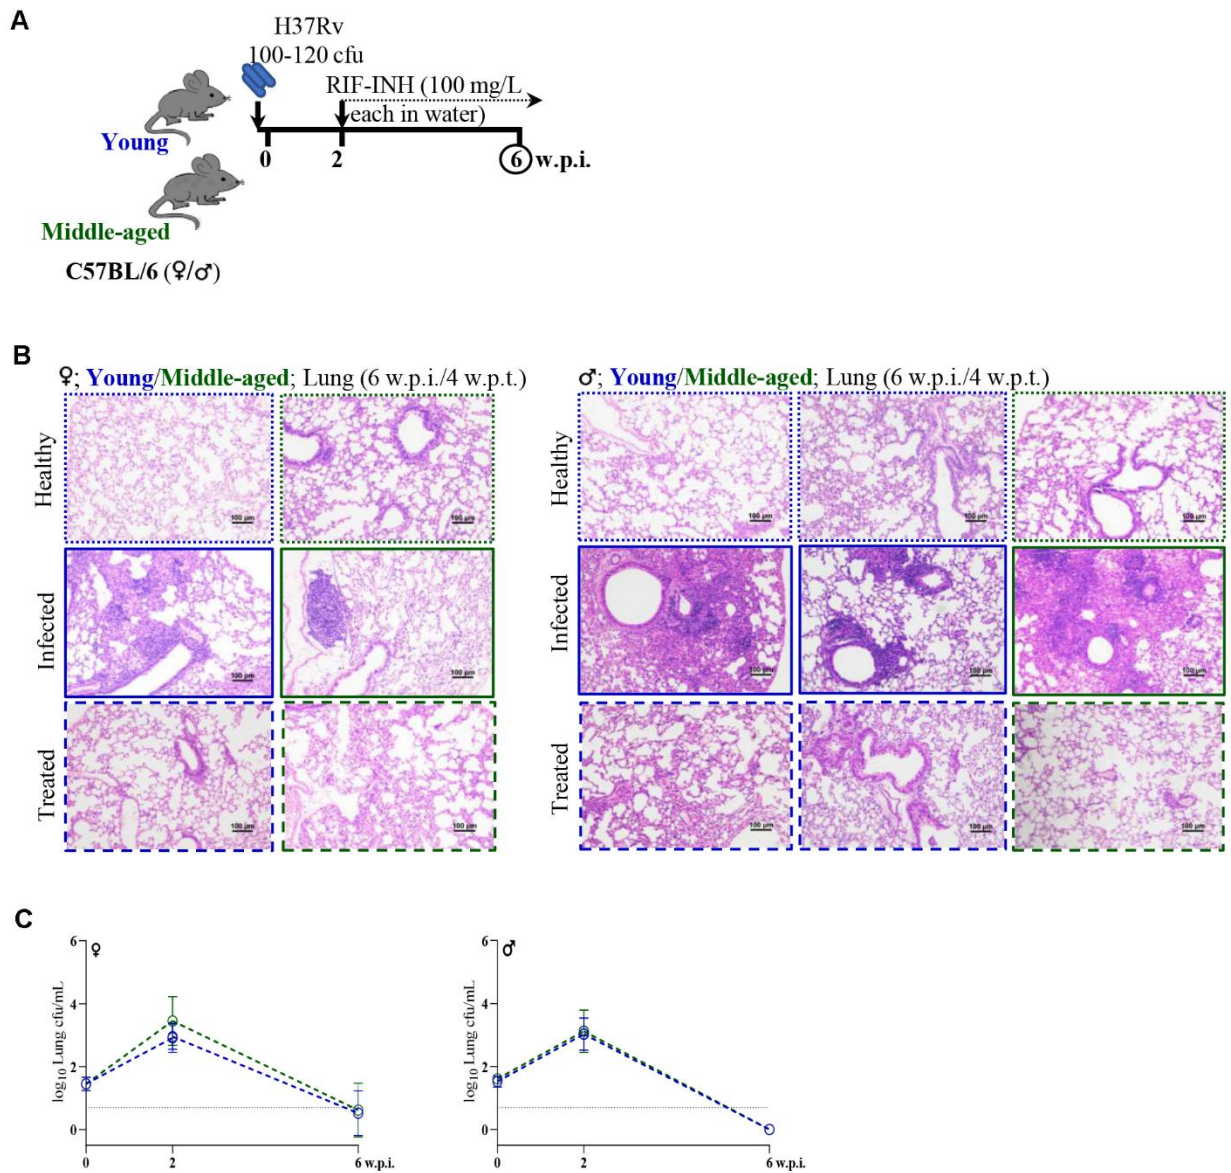

**Supplementary Figure 2. Middle-aged C57BL/6 mice showed similar treatment outcomes post Mtb infection compared to younger mice irrespective of gender.** (A) Schematic of the experimental design for Mtb H37Rv infection and RIF-INH treatment of C57BL/6 mice (female: age groups of 2 and 9 months and male: age groups of 2 and 12 months; M). (B) Lung histopathological images (hematoxylin and eosin: H&E stained, 100× magnification, scale bar=100 μm) at 6 w.p.i./4 w.p.t. along with their respective healthy controls. One set of images of the young mice group at 6 w.p.i./4 w.p.t. was also shown in Supplementary Figure 1B, as a part of the same infection experiment. (C) Lung bacterial burden (in log<sub>10</sub>cfu/mL) in mice belonging to treated group (at 4 w.p.t.; treatment started at 2 w.p.i.) groups; n=5/timepoint/age group/condition; dashed horizontal line represents limit of detection. Young (2 months) mice in blue and middle-aged (9-12 months) mice in green; cfu: colony forming unit; w.p.i.: weeks post infection; w.p.t.: weeks post treatment. Data shown as mean ± SD. See also Figure 1.

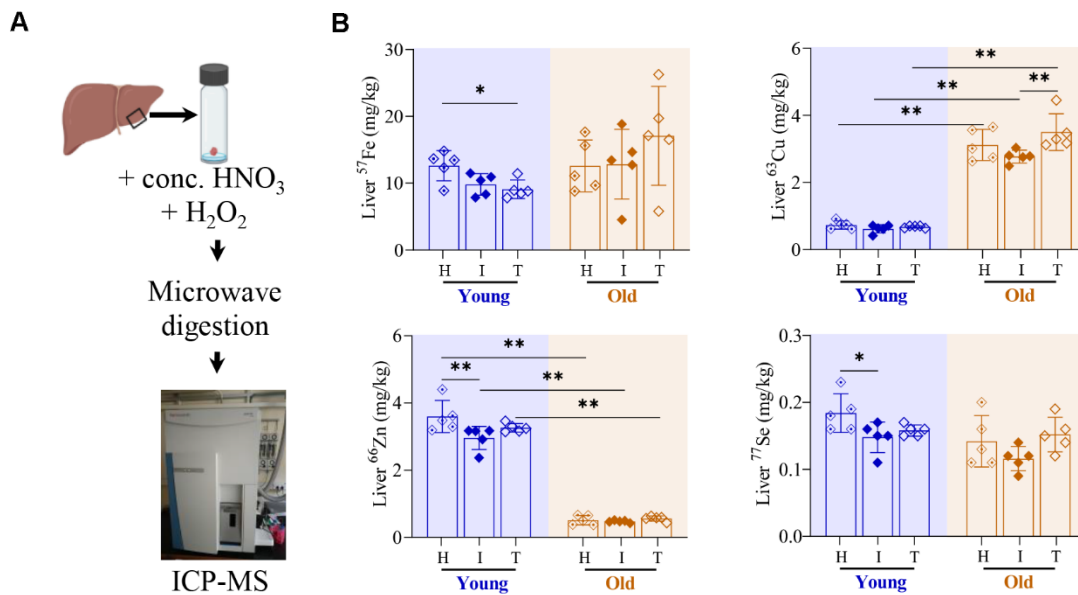

**Supplementary Figure 3. Impaired Mtb clearance in old C57BL/6 mice potentially correlates with abnormal levels of liver micronutrients.** (A) Method adopted for liver micronutrient profiling by inductive coupled plasma mass spectrometry (ICP-MS). (B) Abundance of mice liver micronutrients (in milligram per kilogram): iron- <sup>57</sup>Fe, copper- <sup>63</sup>Cu, zinc- <sup>66</sup>Zn, and selenium- <sup>77</sup>Se of healthy (H), Mtb H37Rv infected (I) and RIF-INH treated (T) groups at 4 w.p.i./2 w.p.t.; n=5/age group/condition. p-values: \* ≤0.05 and \*\* <0.005 at 95% confidence interval by Mann-Whitney test. Data shown as mean ± SD. Young (2 months) in blue and old (17 months) mice in brown.

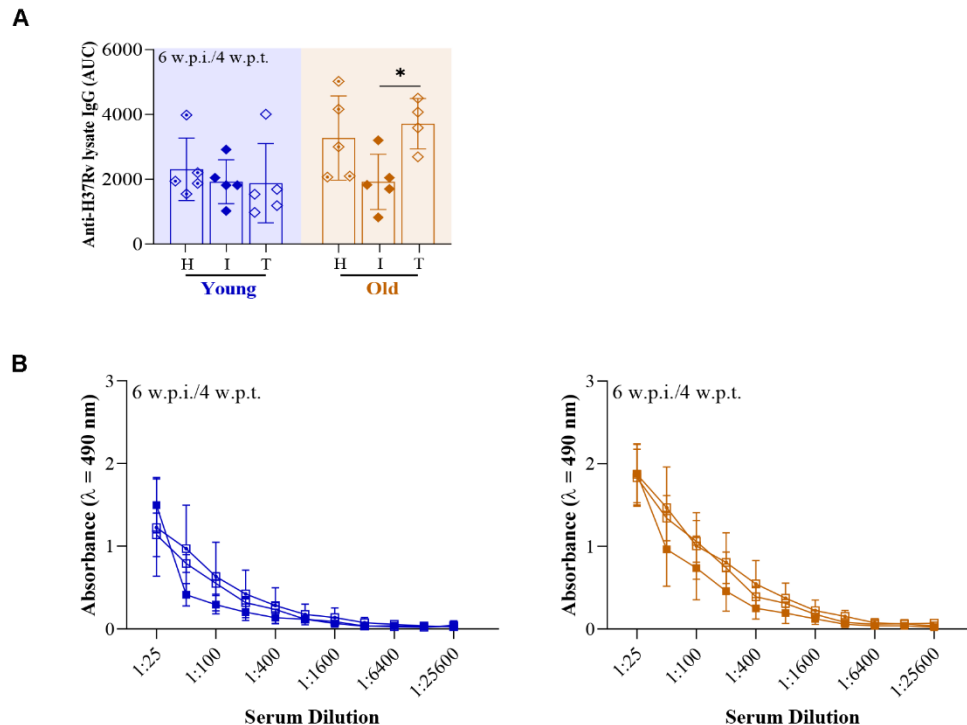

**Supplementary Figure 4. Serum anti-Mtb IgG was higher in old mice after RIF-INH treatment.** (A) Anti-H37Rv lysate IgG estimation with area under the curve (AUC) in the circulation of healthy (H), Mtb H37Rv infected (I) and RIF-INH treated (T) C57BL/6 mice at 6 w.p.i./4 w.p.t.. (B) End-point serum dilutions to monitor anti-IgG titers in mice groups at 6 w.p.i./4 w.p.t.; n = 5/time point/age group/condition (only old-T had n=4 at 4 w.p.t.). Young (2 months) in blue and old (17 months) mice in brown; p-value: \* ≤0.05 at 95% confidence interval by Mann-Whitney test. Data shown as mean ± SD. See also Figure 2.

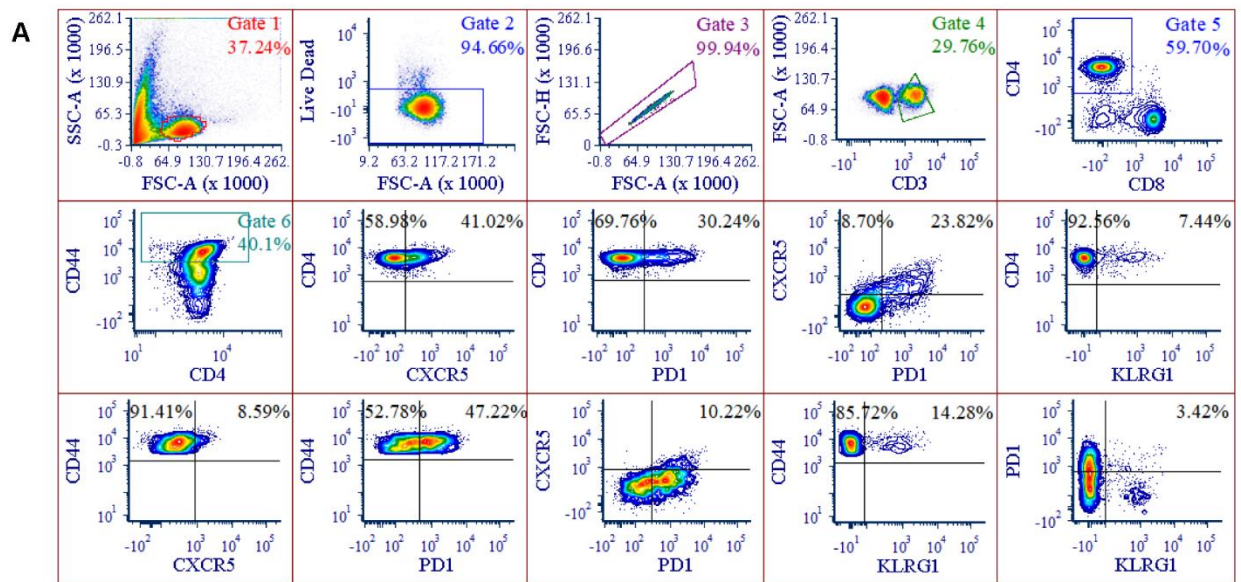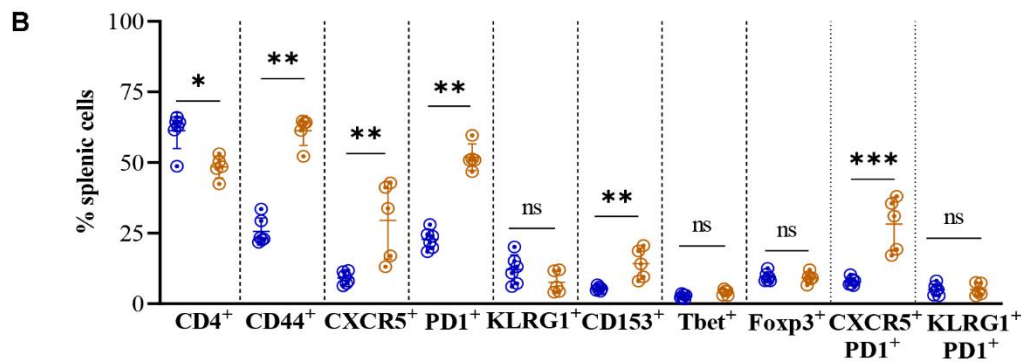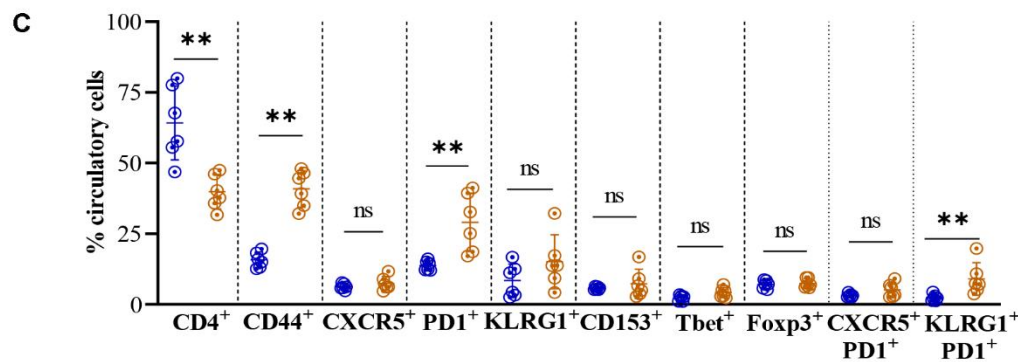

**Supplementary Figure 5. Splenic and circulatory CD4<sup>+</sup> T cell subsets frequency altered in old C57BL/6 mice.** (A) Gating strategy in the lung of a representative mouse adopted to monitor the frequency of multiple CD4<sup>+</sup> T cell subsets; data analyzed using FCS Express (version 6). Frequency of CD4<sup>+</sup>, CD4<sup>+</sup>CD44<sup>+</sup>, CD4<sup>+</sup>CXCR5<sup>+</sup>, CD4<sup>+</sup>PD1<sup>+</sup>, CD4<sup>+</sup>KLRG1<sup>+</sup>, CD4<sup>+</sup>CD153<sup>+</sup>, CD4<sup>+</sup>Tbet<sup>+</sup>, CD4<sup>+</sup>CD25<sup>+</sup>CD127-FoxP3<sup>+</sup>, CD4<sup>+</sup>CXCR5<sup>+</sup>PD1<sup>+</sup> and CD4<sup>+</sup>KLRG1<sup>+</sup>PD1<sup>+</sup> cells in the (B) spleen and (C) circulation of healthy mice are presented. n = 6 for young, n = 5-6 for old mice; Young (2 months) in blue and old (17 months) mice in brown; p-values: ns = non-significant, \*  $\leq 0.05$ , \*\*  $< 0.005$  and \*\*\*  $< 0.0005$  at 95% confidence interval by Mann-Whitney test. Data shown as mean  $\pm$  SD.

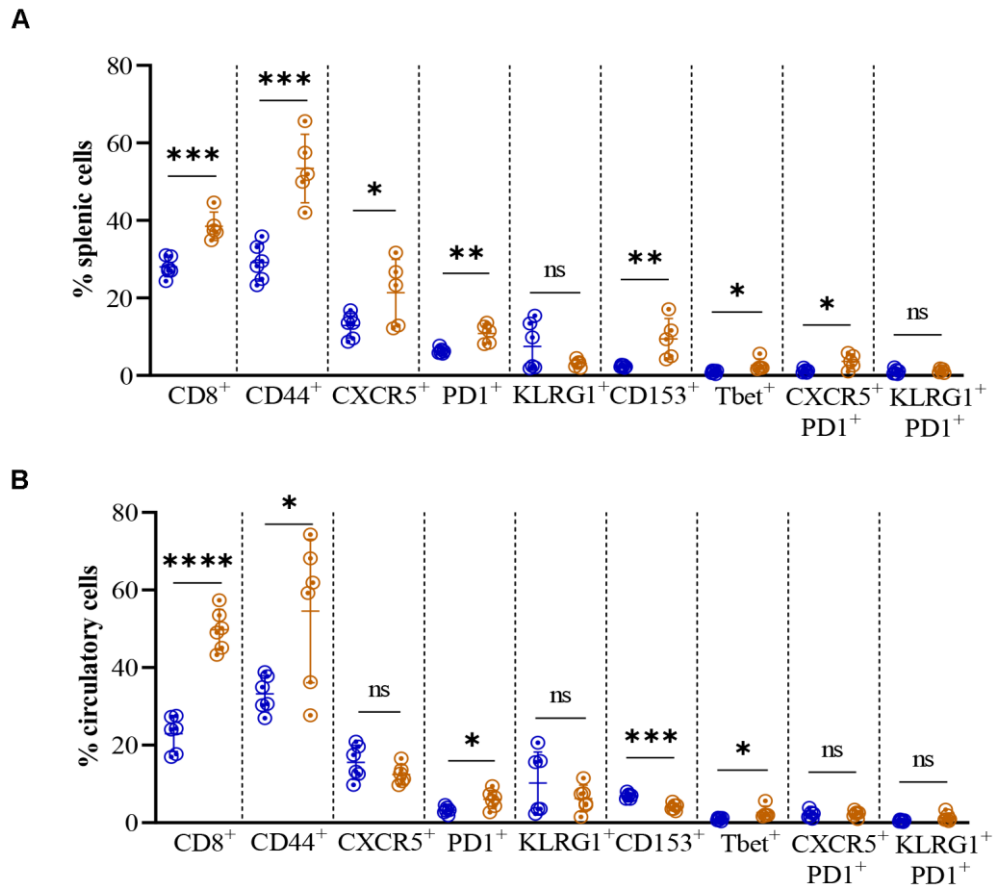

**Supplementary Figure 6. Splenic and circulatory CD8<sup>+</sup> cells subsets altered in old mice.** Frequency of CD8<sup>+</sup>, CD8+CD44<sup>+</sup>, CD8+CXCR5<sup>+</sup>, CD8+PD1<sup>+</sup>, CD8+KLRG1<sup>+</sup>, CD8+CD153<sup>+</sup>, CD8+Tbet<sup>+</sup>, CD8+CXCR5+PD1<sup>+</sup>, CD8+KLRG1+PD1<sup>+</sup> cells in the (A) spleen and (B) circulation of healthy young (n=6) and old (n=5-6) mice are presented. Young (2 months) in blue and old (17 months) mice in brown; p-values: ns = non-significant, \*  $\leq 0.05$ , \*\*  $< 0.005$ , \*\*\*  $< 0.0005$  and \*\*\*\*  $< 0.0001$  at 95% confidence interval by Mann-Whitney test. Data is represented as mean  $\pm$  SD.

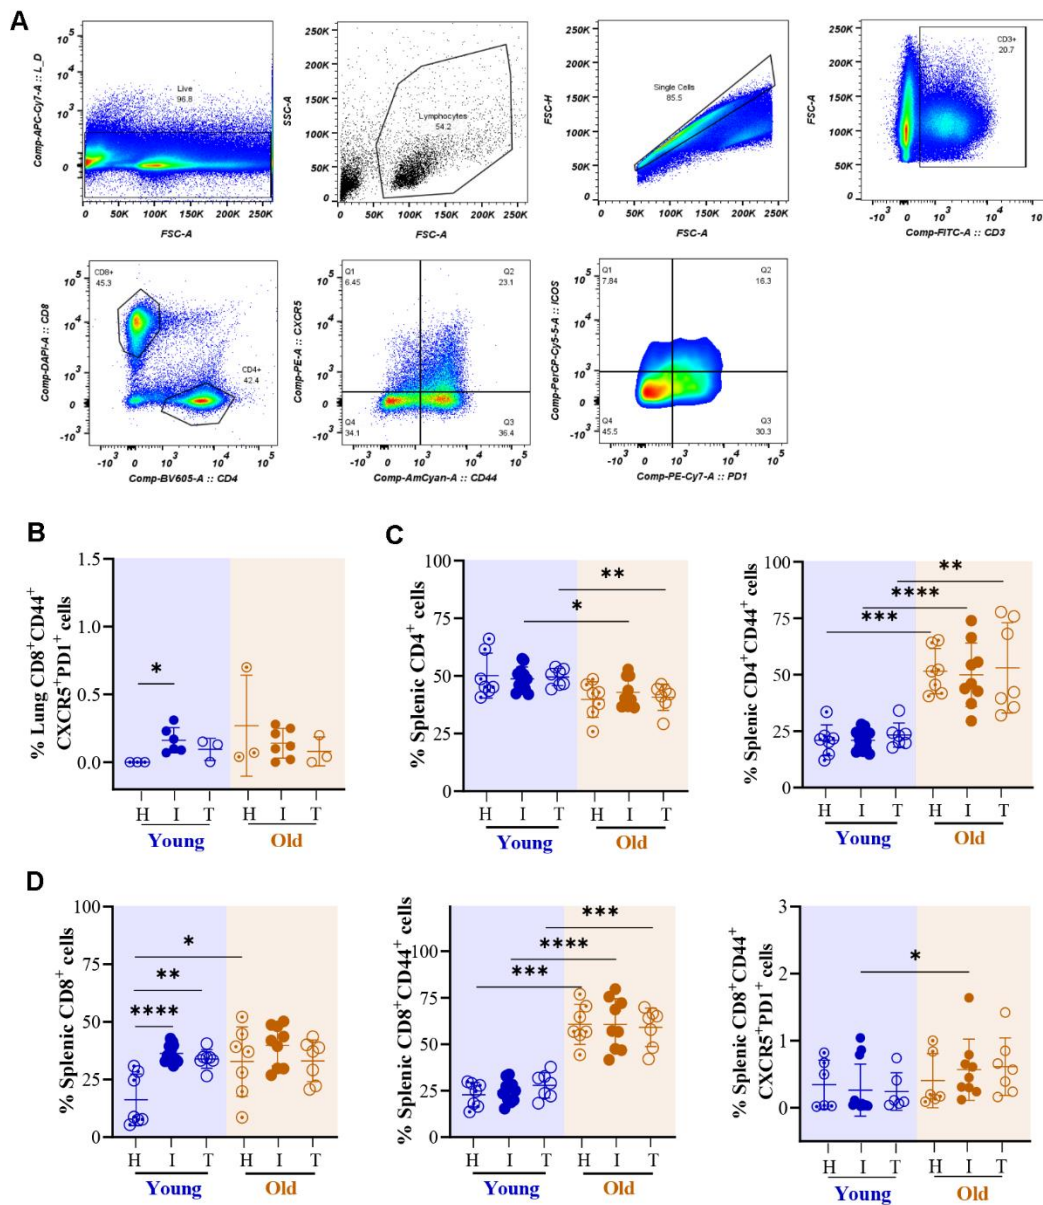

**Supplementary Figure 7. Higher lung and splenic CD8+CD44+CXCR5+PD1+ cells observed in Mtb infected old mice.** (A) Gating strategy of a representative mouse adopted to monitor the frequency of T cell subsets in the lung of C57BL/6 mice; *data analyzed using FlowJo (version 10.8)*. (B) Frequency of lung CD8+CD44+CXCR5+PD1+ cells of healthy (H, n=3/age group), Mtb H37Rv infected (I, n=9-10/age group) and RIF-INH treated (T, n=3/age group) C57BL/6 mice at 4 w.p.i./2 w.p.t.. Frequency of splenic (C) CD4+ and CD4+CD44+ (D) CD8+, CD8+CD44+ and CD8+CD44+CXCR5+PD1+ cells of healthy (H, n=6-7/age group), Mtb H37Rv infected (I, n=9-12/age group) and RIF-INH treated (T, n=6-7/age group) C57BL/6 mice at 4 w.p.i./2 w.p.t. Young (2-4 months) in blue and old (17-19 months) mice in brown; p-values: \*  $\leq 0.05$ , \*\*  $< 0.005$ , \*\*\*  $< 0.0005$  and \*\*\*\*  $< 0.0001$  at 95% confidence interval by Mann-Whitney test. Data shown as mean  $\pm$  SD. See also Figure 3.

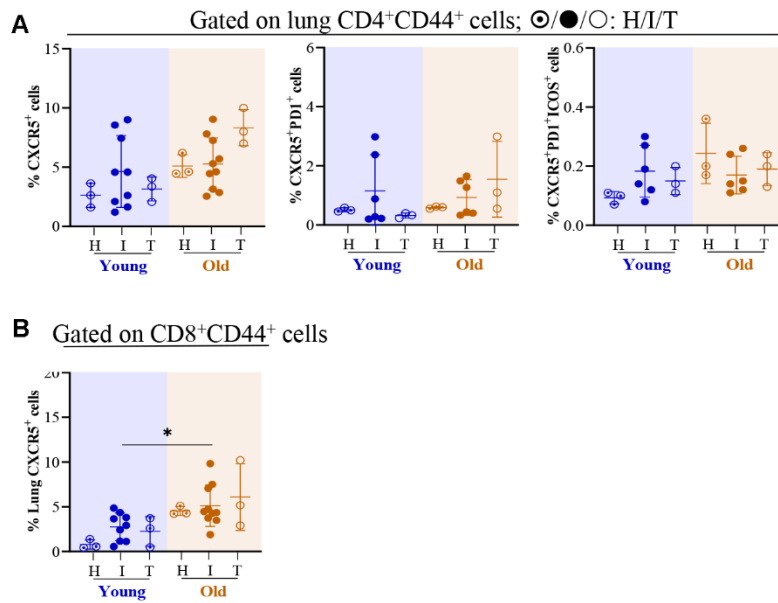

**Supplementary Figure 8. Lung CD8+CD44+CXCR5+ cells were higher in old C57BL/6 mice post Mtb infection.** (A) Frequency of CD4+CD44+CXCR5+, CD4+CD44+CXCR5+PD1+ and CD4+CD44+CXCR5+PD1+ICOS+ cells in the lungs of C57BL/6 mice at 4 w.p.i./2 w.p.t. are presented. (B) Frequency of CD8+CD44+CXCR5+ cells in the lungs and spleen at 4 w.p.i./2 w.p.t. are presented. Healthy (H, n=3/age group), Mtb H37Rv infected (I, n= 6-10/age group) and RIF-INH treated (T, n=3/age group). Young (2- 4 months) in blue and old (17-19 months) mice in brown; p-value: \*  $\leq 0.05$  at 95% confidence interval by Mann-Whitney test. Data shown as mean  $\pm$  SD. See also Figure 3.

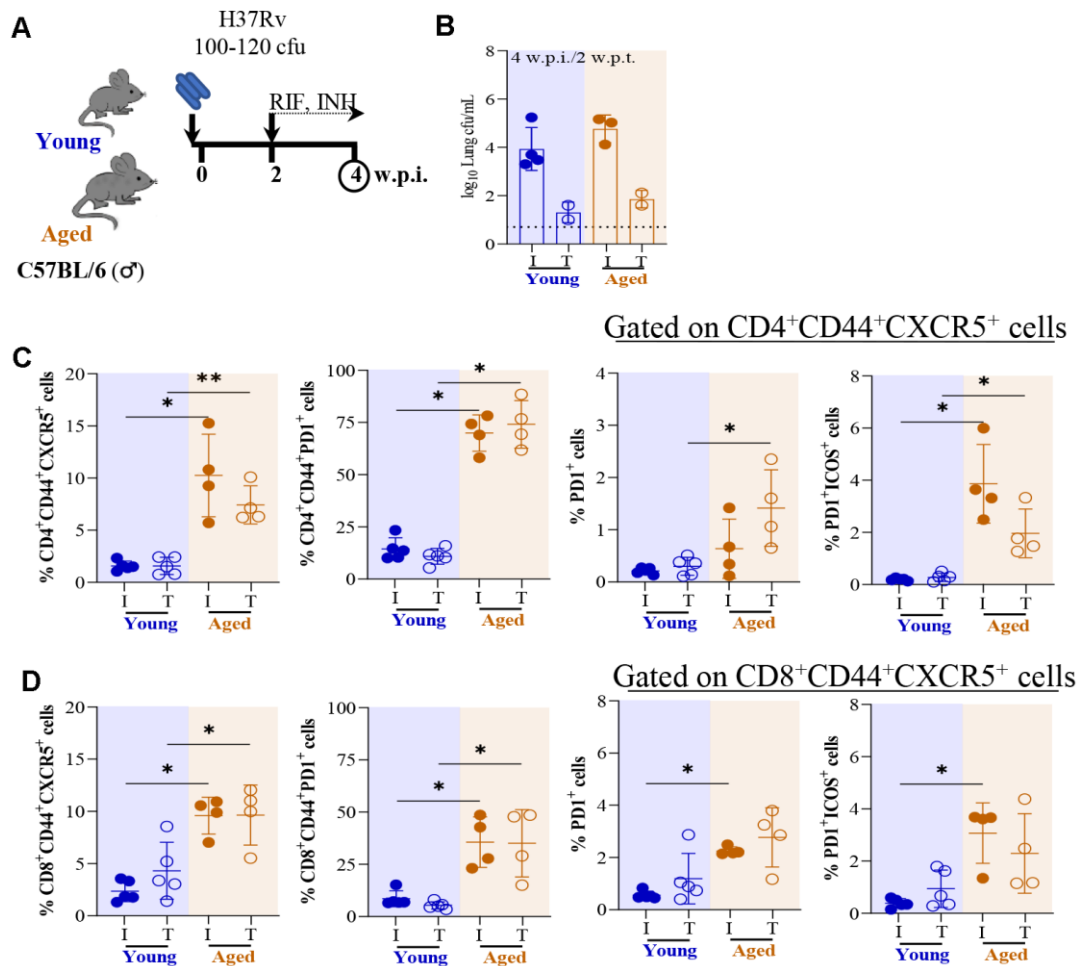

**Supplementary Figure 9. Higher splenic CD4+CD44+CXCR5+ cells observed in aged mice.** (A) Schematic of the experimental design for Mtb H37Rv infection and RIF-INH treatment of male C57BL/6 mice. (B) Lung bacterial burden (in log<sub>10</sub>cfu/mL) of Mtb infected mice (at 4 w.p.i.) and RIF-INH treated mice (at 2 w.p.t.; treatment started at 2 w.p.i.); dashed horizontal line represents limit of detection (LOD); Infected (I) mice: n=3-4 for young and old; Treated (T) mice: n=2 for young and old; rest cfu data points could not be collected due to plate contamination. (C) Frequency of splenic CD4+CD44+CXCR5+, CD4+CD44+PD1+, CD4+CD44+CXCR5+PD1+ and CD4+CD44+CXCR5+PD1+ICOS+ cells of I and T groups of mice at 4 w.p.i./2 w.p.t. (D) Frequency of splenic CD8+CD44+CXCR5+, CD8+CD44+PD1+, CD8+CD44+CXCR5+PD1+ and CD8+CD44+CXCR5+PD1+ICOS+ cells of I and T groups of mice at 4 w.p.i./2 w.p.t. n=4-5/condition; Young (2 months) in blue and aged (31 months) mice in brown; p-values: \* ≤0.05 and \*\* <0.005 at 95% confidence interval by Mann-Whitney test. Data shown as mean ± SD.

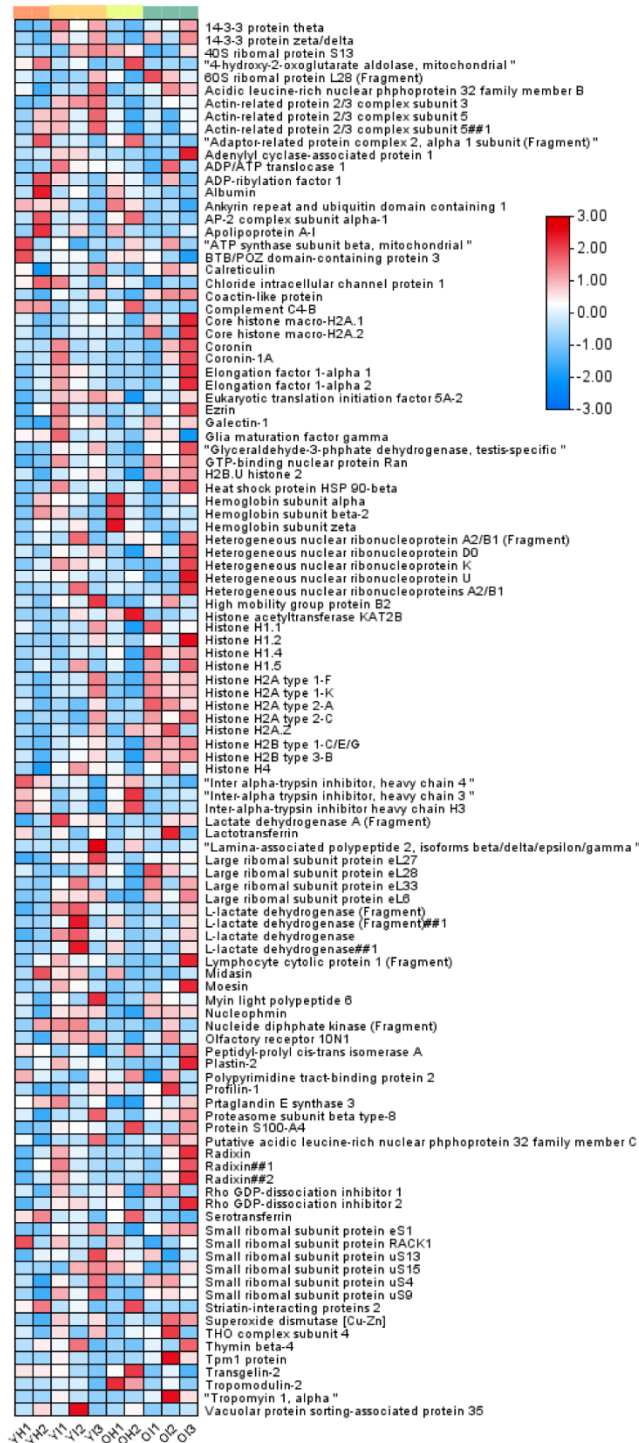

**Supplementary Figure 10. Proteome distribution of CD4+CD44+ T cells changed upon Mtb infection.** Heatmap showing abundance of identified splenic CD4+CD44+ T cell proteins obtained from TMT10plex experiment using healthy (H) and Mtb H37Rv infected (I) C57BL/6 mice groups (Y: young, 4 months) and (O: old, 19 months). Each row presents abundance of individual protein. 1,2,3 shows the biological replicates. Colour intensity indicates the abundance values. See also Figure 3.
