# Supplementary material
Source: publisher site journal article supplement (doi:10.18632/aging.206374)
Supplement: Supplementary file 3 [file aging-v18i1-206374-supplementary-material-SD2.pdf]

## SUPPLEMENTARY TABLES

**Supplementary Table 1. Compiled results of the study. Distribution of different immune cells in young (2M, 4M), old (17M, 19M) and aged (31M) male C57BL/6 mice in (A) spleen of healthy (H), Mtb H37Rv infected (I) and RIF-INH treated (T) groups at 4 w.p.i./2 w.p.t. and in (B) lung of Mtb infected mice at 4 w.p.i.; M: months. See also Figure 3.**

**A**

| Splenic cells                                                          | Condition | 2M      | 4M        | 17M     | 19M     | 31M     |
|------------------------------------------------------------------------|-----------|---------|-----------|---------|---------|---------|
| CD4 <sup>+</sup>                                                       | H         | 58±9    | 43±2      | 45±4    | 37±8    | N/A     |
|                                                                        | I         | 55±2    | 46±3      | 47±6    | 40±5    | 42±5    |
|                                                                        | T         | 49±5    | 49±4      | 43±4    | 41±7    | 43±9    |
| CD4 <sup>+</sup> CD44 <sup>+</sup>                                     | H         | 25±4    | 17±4      | 61±5    | 49±10   | N/A     |
|                                                                        | I         | 23±2    | 20±5      | 65±9    | 42±8    | 88±5    |
|                                                                        | T         | 21±2    | 23±6      | 73±5    | 37±4    | 86±6    |
| CD4 <sup>+</sup> CD44 <sup>+</sup> CXCR5 <sup>+</sup>                  | H         | 3±0.5   | 4±2.6     | 6±1.4   | 14±10   | N/A     |
|                                                                        | I         | 4±0.3   | 4±2.3     | 8±1.5   | 16±3    | 10±4    |
|                                                                        | T         | 2±1.6   | 10±3      | 6±3.2   | 23±4    | 7.4±1.8 |
| CD4 <sup>+</sup> CD44 <sup>+</sup> CXCR5 <sup>+</sup> PD1 <sup>+</sup> | H         | 3.8±1.3 | 1±0.7     | 8±4.7   | 3.4±2   | N/A     |
|                                                                        | I         | 4.5±1.4 | 1±0.6     | 16±11   | 4.7±0.8 | 0.6±0.5 |
|                                                                        | T         | 3.8±1.2 | 1.3±0.1   | 9±3.3   | 5.8±1.2 | 1.4±0.7 |
| CD8 <sup>+</sup>                                                       | H         | 28±2    | 14±13     | 38±4    | 29±16   | N/A     |
|                                                                        | I         | 34±3    | 37±4      | 32±7    | 44±7    | 46±5    |
|                                                                        | T         | 29±4    | 35±3      | 24±4    | 40±2    | 42±7    |
| CD8 <sup>+</sup> CD44 <sup>+</sup>                                     | H         | 28±1    | 18±4      | 60±5    | 60±13   | N/A     |
|                                                                        | I         | 29±3    | 23±5      | 56±20   | 62±11   | 77±9    |
|                                                                        | T         | 20±2    | 31±5      | 53±14   | 63±3    | 71±16   |
| CD8 <sup>+</sup> CD44 <sup>+</sup> CXCR5 <sup>+</sup>                  | H         | 1.6±1   | 1.6±0.9   | 0.5±0.1 | 6±3     | N/A     |
|                                                                        | I         | 1±0.4   | 2.4±1.5   | 4±2     | 8.4±3.5 | 9.6±1.7 |
|                                                                        | T         | 1.5±0.8 | 5±2       | 2±3     | 7.6±2.3 | 9.6±2.8 |
| CD8 <sup>+</sup> CD44 <sup>+</sup> CXCR5 <sup>+</sup> PD1 <sup>+</sup> | H         | 0.6±0.2 | 0.02±0.01 | 1.7±1   | 0.2±0.3 | N/A     |
|                                                                        | I         | 0.9±0.1 | 0.05±0.02 | 1.7±1.6 | 0.3±0.1 | 2.3±0.1 |
|                                                                        | T         | 0.5±0.2 | 0.07±0.03 | 0.9±0.4 | 0.3±0.2 | 2.8±1.2 |

**B**

| Lung cells                                                             | 2M      | 4M       | 17M     | 19M      |
|------------------------------------------------------------------------|---------|----------|---------|----------|
| CD4 <sup>+</sup>                                                       | 28±6    | 41±8     | 26±2    | 48±13    |
| CD4 <sup>+</sup> CD44 <sup>+</sup>                                     | 47±1    | 65±5     | 75±4    | 69±9     |
| CD4 <sup>+</sup> CD44 <sup>+</sup> CXCR5 <sup>+</sup>                  | 3±1     | 4±3      | 3.6±1.7 | 5±2      |
| CD4 <sup>+</sup> CD44 <sup>+</sup> CXCR5 <sup>+</sup> PD1 <sup>+</sup> | 6±3     | 1.1±1    | 2±1     | 0.8±0.6  |
| CD8 <sup>+</sup>                                                       | 17±3    | 32±9     | 18±4    | 30±7     |
| CD8 <sup>+</sup> CD44 <sup>+</sup>                                     | 45±15   | 57±10    | 82±4    | 64±15    |
| CD8 <sup>+</sup> CD44 <sup>+</sup> CXCR5 <sup>+</sup>                  | 0.9±0.3 | 3.6±0.9  | 6±3     | 4.3±1.7  |
| CD8 <sup>+</sup> CD44 <sup>+</sup> CXCR5 <sup>+</sup> PD1 <sup>+</sup> | 4±2     | 0.16±0.1 | 2±1     | 0.14±0.1 |

**Supplementary Table 2. Total number of sorted activated splenic CD4+ T cells and their protein amount from healthy young (4 months) and old (19 months) C57BL/6 mice upon Mtb H37Rv infection and RIF -INH treatment. See also Figure 3.**

| <b>Mice Condition</b>   | <b>Number of CD4+ CD44+ cells sorted</b> | <b>Total protein amount (µg)</b> |
|-------------------------|------------------------------------------|----------------------------------|
| Healthy (Young)         | 4,31,308                                 | 24.53                            |
|                         | 3,23,580                                 | 13.96                            |
|                         | 4,41,483                                 | 9.06                             |
|                         | 4,35,189                                 | 20.38                            |
| Mtb-infected (Young)    | 5,82,869                                 | 15.47                            |
|                         | 3,50,937                                 | 6.79                             |
|                         | 3,00,415                                 | 6.42                             |
|                         | 2,80,196                                 | 16.60                            |
| RIF-INH treated (Young) | 1,63,427                                 | 7.17                             |
|                         | 2,00,368                                 | 20.00                            |
|                         | 2,47,515                                 | 13.58                            |
|                         | 3,20,773                                 | 24.91                            |
| Healthy (Old)           | 6,49,437                                 | 18.11                            |
|                         | 1,36,499                                 | 1.13                             |
|                         | 5,18,395                                 | 6.79                             |
|                         | 5,34,188                                 | 10.94                            |
| Mtb-infected (Old)      | 3,61,425                                 | 15.47                            |
|                         | 10,17,677                                | 19.25                            |
|                         | 6,63,651                                 | 13.21                            |
|                         | 4,55,972                                 | 8.30                             |
| RIF-INH treated (Old)   | 4,37,661                                 | 14.72                            |
|                         | 4,28,506                                 | 12.45                            |
|                         | 6,22,087                                 | 20.38                            |
|                         | 6,84,220                                 | 10.94                            |
| Healthy (Old)           | 3,67,149                                 | 10.57                            |
|                         | 7,38,297                                 | 6.79                             |
|                         | 3,66,620                                 | 36.23                            |
|                         | 1,99,573                                 | 36.60                            |
| Mtb-infected (Old)      | 3,51,695                                 | 8.68                             |
