# Supplementary material
Source: publisher site journal article supplement (doi:10.18632/aging.206374)
Supplement: Supplementary file 4 [file aging-v18i1-206374-supplementary-material-SD3.pdf]

**Supplementary Table 3. List of identified proteins (n= 109) from splenic CD4<sup>+</sup> CD44<sup>+</sup> T cells (TMT- Set 1) showing Mtb H37Rv infected young and old C57BL/6 mice with their respective healthy controls. Y: young (4 months); O: old (19 months); I: Mtb infected; H: Healthy. See also Figure 3.**

| Accession  | Identified Protein(s) name                                    | log <sub>2</sub> fold change |         |         |         |         |         |         |         |
|------------|---------------------------------------------------------------|------------------------------|---------|---------|---------|---------|---------|---------|---------|
|            |                                                               | YI1/YH2                      | YI2/YH2 | YI3/YH2 | YH1/YH2 | OI1/OH2 | OI2/OH2 | OI3/OH2 | OH1/OH2 |
| P68254     | 14-3-3 protein theta                                          | 1.66                         | 1.01    | 1.46    | -0.12   | 0.95    | 1.12    | 1.66    | 0.47    |
| P63101     | 14-3-3 protein zeta/delta                                     | 2.12                         | 1.53    | 2.35    | 0.86    | 2.32    | 1.17    | 2.58    | 0.70    |
| Q921R2     | 40S ribosomal protein S13                                     | -0.27                        | 1.00    | 1.19    | 0.11    | -1.35   | -1.03   | 0.08    | 0.33    |
| Q9DCU9     | 4-hydroxy-2-oxoglutarate aldolase, mitochondrial              | -1.45                        | -0.98   | -2.35   | -0.75   | -2.04   | -1.97   | -2.13   | -2.09   |
| F6Z0X0     | 60S ribosomal protein L28 (Fragment)                          | -0.16                        | 0.31    | 1.75    | 0.92    | 3.42    | 2.73    | 2.05    | 2.23    |
| Q9EST5     | Acidic leucine-rich nuclear phosphoprotein 32 family member B | 0.94                         | 0.97    | 2.05    | 1.31    | 0.32    | 0.99    | 0.70    | -0.52   |
| Q9JM76     | Actin-related protein 2/3 complex subunit 3                   | 1.86                         | 2.12    | 2.31    | -0.11   | 1.30    | 1.85    | 1.73    | 1.26    |
| Q3UA72     | Actin-related protein 2/3 complex subunit 5                   | 0.04                         | -0.36   | 0.33    | -0.70   | 0.78    | 0.13    | 0.92    | 0.86    |
| Q9CPW4     | Actin-related protein 2/3 complex subunit 5                   | 0.04                         | -0.36   | 0.33    | -0.70   | 0.78    | 0.13    | 0.92    | 0.86    |
| A0A140LIG7 | Adaptor-related protein complex 2, alpha 1 subunit (Fragment) | -1.96                        | -1.71   | -3.40   | -2.08   | -2.80   | -2.06   | -3.14   | -1.02   |
| P40124     | Adenylyl cyclase-associated protein 1                         | 0.79                         | 0.74    | -0.15   | -0.31   | -0.49   | -0.20   | 2.45    | 0.21    |
| P48962     | ADP/ATP translocase 1                                         | 1.60                         | 0.89    | 0.77    | -0.23   | -1.22   | 1.49    | -0.22   | 0.49    |
| P84078     | ADP-ribosylation factor 1                                     | -0.72                        | -1.43   | -2.10   | -1.86   | -1.19   | 0.60    | -1.15   | 0.32    |
| P07724     | Albumin                                                       | -3.24                        | -1.89   | -4.74   | -3.08   | -0.57   | -2.00   | -2.07   | 1.12    |
| A0A5F8MPK3 | Ankyrin repeat and ubiquitin domain containing 1              | -0.03                        | -1.30   | -2.06   | 0.23    | -1.53   | -1.16   | -3.56   | 0.66    |
| P17426     | AP-2 complex subunit alpha-1                                  | -1.96                        | -1.71   | -3.40   | -2.08   | -2.80   | -2.06   | -3.14   | -1.02   |
| Q00623     | Apolipoprotein A-I                                            | -2.97                        | -1.41   | -6.18   | -4.63   | -1.61   | -1.28   | 1.08    | 2.50    |
| P56480     | ATP synthase subunit beta, mitochondrial                      | 0.30                         | -0.30   | 0.04    | 0.76    | -0.30   | 0.14    | -0.46   | -0.43   |
| P58545     | BTB/POZ domain-containing protein 3                           | 0.25                         | 0.28    | -1.00   | 1.42    | -0.28   | -1.08   | -3.33   | -0.05   |
| P14211     | Calreticulin                                                  | 2.17                         | 1.96    | 2.82    | 2.33    | 1.17    | 1.58    | 1.26    | 0.47    |
| Q9Z1Q5     | Chloride intracellular channel protein 1                      | -0.15                        | -1.05   | -1.87   | -0.71   | -1.20   | -0.36   | -0.60   | 0.35    |
| Q9CQI6     | Coactosin-like protein                                        | 2.00                         | 1.50    | 2.43    | 1.31    | 2.37    | 2.82    | 2.83    | 1.13    |

|            |                                                           |       |       |       |       |       |       |       |       |
|------------|-----------------------------------------------------------|-------|-------|-------|-------|-------|-------|-------|-------|
| P01029     | Complement C4-B                                           | -1.79 | -1.02 | -2.01 | -0.05 | -2.34 | -1.99 | -2.26 | -1.14 |
| Q9QZQ8     | Core histone macro-H2A.1                                  | 0.32  | 0.74  | 0.85  | 0.68  | 1.16  | 0.71  | 1.81  | 0.77  |
| Q8CCK0     | Core histone macro-H2A.2                                  | 0.51  | 0.96  | 0.90  | 0.86  | 1.85  | -0.16 | 2.20  | 0.49  |
| G3UYK8     | Coronin                                                   | 1.95  | -0.02 | 0.52  | 0.14  | -1.26 | 1.92  | 2.62  | -0.28 |
| O89053     | Coronin-1A                                                | 1.68  | -0.16 | -0.14 | -0.36 | -1.24 | 1.23  | 2.12  | -0.37 |
| P10126     | Elongation factor 1-alpha 1                               | 1.24  | 0.67  | -0.03 | -1.32 | -0.51 | 0.79  | 2.72  | 0.07  |
| P62631     | Elongation factor 1-alpha 2                               | 1.12  | 0.29  | -0.20 | -1.41 | -0.79 | 0.77  | 2.51  | -0.34 |
| Q8BGY2     | Eukaryotic translation initiation factor 5A-2             | 0.83  | 0.71  | 1.02  | -0.91 | 2.04  | 1.91  | 2.50  | 2.52  |
| P26040     | Ezrin                                                     | 0.75  | -0.39 | -0.67 | -1.72 | -0.81 | 0.42  | 1.38  | -0.50 |
| P16045     | Galectin-1                                                | 3.21  | 2.53  | 2.83  | 0.62  | 0.85  | 0.27  | 0.73  | -1.11 |
| Q9ERL7     | Glia maturation factor gamma                              | 0.62  | -0.53 | -0.37 | -0.06 | 1.11  | 1.09  | -1.25 | 0.52  |
| Q64467     | Glyceraldehyde-3-phosphate dehydrogenase, testis-specific | 1.52  | 1.20  | 1.90  | -0.07 | 2.64  | 2.73  | 3.81  | 1.56  |
| P62827     | GTP-binding nuclear protein Ran                           | 1.70  | 0.75  | 1.05  | -0.49 | 1.66  | 1.08  | 1.76  | 0.31  |
| Q9D2U9     | H2B.U histone 2                                           | 1.43  | 1.72  | 2.04  | 1.38  | 3.09  | 2.96  | 3.25  | 2.02  |
| P11499     | Heat shock protein HSP 90-beta                            | 1.52  | 0.31  | 0.59  | -0.43 | -1.68 | 0.64  | 1.22  | -0.44 |
| P01942     | Hemoglobin subunit alpha                                  | -0.61 | -0.84 | -3.25 | -3.36 | -2.11 | -0.27 | 0.80  | 2.36  |
| P02089     | Hemoglobin subunit beta-2                                 | -0.41 | -1.61 | -2.36 | -2.36 | -1.53 | 0.04  | -0.26 | 1.65  |
| P06467     | Hemoglobin subunit zeta                                   | -0.51 | 0.28  | -3.73 | -2.75 | -3.19 | -2.34 | -0.59 | 2.53  |
| A0A0N4SUM2 | Heterogeneous nuclear ribonucleoprotein A2/B1 (Fragment)  | -0.44 | 1.10  | -1.04 | -0.84 | -0.17 | -1.87 | 0.71  | -0.66 |
| Q60668     | Heterogeneous nuclear ribonucleoprotein D0                | 1.18  | 0.84  | 1.46  | 0.71  | 3.20  | 2.60  | 4.06  | 2.05  |
| H3BLL4     | Heterogeneous nuclear ribonucleoprotein K                 | 0.91  | 0.61  | 0.12  | -0.78 | -0.09 | 0.76  | 2.32  | 0.58  |
| Q8VEK3     | Heterogeneous nuclear ribonucleoprotein U                 | 0.30  | -0.12 | -0.80 | -0.27 | -2.58 | -1.64 | 1.66  | -0.61 |
| O88569     | Heterogeneous nuclear ribonucleoproteins A2/B1            | 0.41  | 3.24  | -0.34 | -1.07 | -0.38 | -1.31 | 3.30  | 0.82  |
| P30681     | High mobility group protein B2                            | 2.17  | 1.67  | 3.63  | 1.34  | 2.29  | 3.44  | 1.87  | 0.16  |
| Q9JHD1     | Histone acetyltransferase KAT2B                           | -0.82 | 5.28  | 3.75  | -0.37 | -9.30 | -7.78 | -4.06 | -1.77 |
| P43275     | Histone H1.1                                              | 0.68  | 0.54  | 1.83  | 0.96  | 4.63  | 3.44  | 3.65  | 3.18  |
| P15864     | Histone H1.2                                              | -0.10 | 1.78  | 3.26  | 0.38  | 2.67  | 1.43  | 4.77  | 1.72  |
| P43274     | Histone H1.4                                              | -0.76 | 0.30  | -0.19 | -0.45 | 4.92  | 4.04  | 4.52  | 3.79  |
| P43276     | Histone H1.5                                              | -0.97 | 1.11  | -1.31 | -1.50 | 4.62  | 3.14  | 5.11  | 3.57  |

|            |                                                                    |       |       |       |       |       |       |       |       |
|------------|--------------------------------------------------------------------|-------|-------|-------|-------|-------|-------|-------|-------|
| Q8CGP5     | Histone H2A type 1-F                                               | 1.08  | 1.13  | 2.34  | 0.84  | 2.67  | 2.19  | 2.39  | 0.81  |
| Q8CGP7     | Histone H2A type 1-K                                               | 1.08  | 1.13  | 2.34  | 0.84  | 2.67  | 2.19  | 2.39  | 0.81  |
| Q6GSS7     | Histone H2A type 2-A                                               | 1.35  | 0.20  | 2.91  | 2.16  | 2.38  | 2.02  | 1.48  | -0.74 |
| Q64523     | Histone H2A type 2-C                                               | -0.03 | -0.35 | 0.81  | -0.25 | 0.83  | 0.48  | 0.97  | 0.11  |
| P0C0S6     | Histone H2A.Z                                                      | 0.85  | 0.33  | 1.64  | 0.58  | -0.11 | 0.51  | -1.00 | -1.67 |
| Q6ZWY9     | Histone H2B type 1-C/E/G                                           | 1.08  | 1.40  | 1.69  | 0.51  | 2.66  | 2.54  | 2.83  | 1.44  |
| Q8CGP0     | Histone H2B type 3-B                                               | 1.43  | 1.72  | 2.04  | 1.38  | 3.09  | 2.96  | 3.25  | 2.02  |
| P62806     | Histone H4                                                         | 2.17  | 2.68  | 2.25  | 1.50  | 1.25  | 1.82  | 1.05  | 1.11  |
| A6X935     | Inter alpha-trypsin inhibitor, heavy chain 4                       | -0.70 | -0.54 | -2.38 | 0.63  | -1.01 | -1.31 | -2.37 | -0.34 |
| A0A2I3BRQ3 | Inter-alpha trypsin inhibitor, heavy chain 3                       | -0.83 | -0.24 | -1.44 | 0.30  | -1.83 | -1.40 | -1.25 | -1.00 |
| Q61704     | Inter-alpha-trypsin inhibitor heavy chain H3                       | -0.94 | -0.39 | -1.62 | 0.38  | -1.68 | -1.48 | -1.32 | -0.75 |
| A0A1B0GSL7 | Lactate dehydrogenase A (Fragment)                                 | 1.62  | 0.78  | 0.83  | -1.14 | -0.25 | 0.92  | 0.94  | -0.23 |
| P08071     | Lactotransferrin                                                   | 1.80  | -1.20 | 1.62  | 2.06  | -0.36 | 2.40  | -2.68 | -1.57 |
| Q61029     | Lamina-associated polypeptide 2, isoforms beta/delta/epsilon/gamma | -1.26 | -1.06 | 5.25  | -0.54 | -4.81 | -4.59 | -1.97 | -3.82 |
| P61358     | Large ribosomal subunit protein eL27                               | 2.33  | 2.35  | 3.57  | -1.40 | 1.21  | 1.27  | 1.45  | 0.91  |
| P41105     | Large ribosomal subunit protein eL28                               | -0.16 | 0.31  | 1.75  | 0.92  | 3.42  | 2.73  | 2.05  | 2.23  |
| O55142     | Large ribosomal subunit protein eL33                               | 1.00  | 1.83  | 0.37  | 0.18  | 2.55  | 1.03  | 2.34  | 1.45  |
| P47911     | Large ribosomal subunit protein eL6                                | 0.75  | 0.78  | 0.92  | -0.14 | 1.45  | 1.06  | 1.67  | 0.13  |
| D3YZQ9     | L-lactate dehydrogenase (Fragment)                                 | 1.14  | 1.35  | 0.46  | -0.49 | 0.13  | 0.49  | 0.96  | 0.50  |
| A0A0N4SVV8 | L-lactate dehydrogenase (Fragment)                                 | 0.58  | 1.80  | 0.06  | 0.00  | 0.46  | 0.01  | 0.97  | 1.04  |
| A0A1B0GQX5 | L-lactate dehydrogenase                                            | 1.14  | 1.35  | 0.46  | -0.49 | 0.13  | 0.49  | 0.96  | 0.50  |
| A0A6I8MX27 | L-lactate dehydrogenase                                            | 0.58  | 1.80  | 0.06  | 0.00  | 0.46  | 0.01  | 0.97  | 1.04  |
| D3Z311     | Lymphocyte cytosolic protein 1 (Fragment)                          | 1.00  | -0.04 | 0.11  | -2.06 | -0.42 | 1.47  | 4.36  | 1.08  |
| A2ANY6     | Midasin                                                            | -0.92 | -0.68 | -2.32 | -1.98 | 0.58  | 0.06  | 1.12  | 2.28  |
| P26041     | Moesin                                                             | 0.92  | 0.54  | 0.01  | -0.27 | -0.18 | 0.63  | 1.74  | -0.38 |
| Q60605     | Myosin light polypeptide 6                                         | 0.98  | 0.48  | 1.86  | 0.79  | 0.81  | 0.56  | 0.44  | -0.26 |
| Q61937     | Nucleophosmin                                                      | 1.98  | 2.10  | 2.10  | 1.34  | 2.93  | 2.89  | 2.76  | 1.06  |
| Q5NC80     | Nucleoside diphosphate kinase (Fragment)                           | 0.09  | 0.11  | -1.03 | -1.05 | -0.34 | 0.80  | -0.04 | -0.11 |
| Q60887     | Olfactory receptor 10N1                                            | 2.66  | 2.87  | 2.82  | 1.51  | 1.97  | 3.03  | 1.89  | 1.74  |
| P17742     | Peptidyl-prolyl cis-trans isomerase A                              | -0.75 | -0.13 | -1.50 | 0.16  | -0.93 | -1.23 | 0.25  | -1.02 |

|            |                                                                        |       |       |       |       |       |       |       |       |
|------------|------------------------------------------------------------------------|-------|-------|-------|-------|-------|-------|-------|-------|
| Q61233     | Plastin-2                                                              | 1.00  | -0.04 | 0.11  | -2.06 | -0.42 | 1.47  | 4.36  | 1.08  |
| Q91Z31     | Polypyrimidine tract-binding protein 2                                 | -0.13 | -0.38 | 0.17  | 0.32  | -1.12 | -0.08 | -0.56 | -0.42 |
| P62962     | Profilin-1                                                             | 0.82  | 2.07  | 2.77  | 1.64  | 0.68  | 1.90  | -0.10 | 0.94  |
| D3Z7C6     | Prostaglandin E synthase 3                                             | 0.22  | -0.50 | -0.23 | -0.20 | 1.18  | 0.93  | 1.34  | 0.10  |
| P28063     | Proteasome subunit beta type-8                                         | 2.01  | 2.25  | 3.74  | 2.41  | 1.33  | 1.75  | 2.28  | 0.86  |
| P07091     | Protein S100-A4                                                        | 2.46  | 2.31  | 2.02  | -0.74 | -3.14 | -2.93 | -0.49 | -3.41 |
| Q64G17     | Putative acidic leucine-rich nuclear phosphoprotein 32 family member C | 0.94  | 0.97  | 2.05  | 1.31  | 0.32  | 0.99  | 0.70  | -0.52 |
| A0A5F8MPB9 | Radixin                                                                | 0.89  | 0.23  | -0.31 | -1.14 | -0.33 | 0.85  | 1.81  | 0.04  |
| Q7TSG6     | Radixin                                                                | 0.75  | -0.39 | -0.67 | -1.72 | -0.81 | 0.42  | 1.38  | -0.50 |
| P26043     | Radixin                                                                | 0.89  | 0.23  | -0.31 | -1.14 | -0.33 | 0.85  | 1.81  | 0.04  |
| Q99PT1     | Rho GDP-dissociation inhibitor 1                                       | 1.38  | 0.67  | 0.86  | 0.84  | 2.01  | 1.96  | 0.82  | 1.60  |
| Q61599     | Rho GDP-dissociation inhibitor 2                                       | 0.60  | 0.73  | 0.16  | -1.15 | 0.80  | 0.36  | 2.36  | 1.20  |
| Q921I1     | Serotransferrin                                                        | -1.73 | -1.43 | -3.51 | -0.72 | -2.23 | -3.38 | -4.54 | -1.28 |
| P97351     | Small ribosomal subunit protein eS1                                    | 0.79  | 0.54  | 1.23  | 0.01  | 1.30  | 1.63  | 1.78  | 0.90  |
| P68040     | Small ribosomal subunit protein RACK1                                  | 0.93  | 0.20  | -0.20 | 1.49  | -1.44 | -0.42 | 0.31  | 0.79  |
| P62270     | Small ribosomal subunit protein uS13                                   | 0.06  | -0.16 | 0.79  | -0.74 | 0.39  | -1.01 | -0.07 | 0.26  |
| P62301     | Small ribosomal subunit protein uS15                                   | -0.27 | 1.00  | 1.19  | 0.11  | -1.35 | -1.03 | 0.08  | 0.33  |
| Q6ZWN5     | Small ribosomal subunit protein uS4                                    | 2.33  | 1.65  | 3.03  | 1.76  | 1.31  | 1.47  | 0.79  | -0.29 |
| P14131     | Small ribosomal subunit protein uS9                                    | 2.26  | 1.66  | 2.58  | 1.08  | 1.32  | 1.46  | 1.31  | 0.34  |
| Q8C9H6     | Striatin-interacting proteins 2                                        | -1.45 | -0.98 | -2.35 | -0.75 | -2.04 | -1.97 | -2.13 | -2.09 |
| P08228     | Superoxide dismutase [Cu-Zn]                                           | 2.86  | 2.05  | 2.74  | 1.35  | -0.53 | 1.48  | 1.20  | -0.97 |
| O08583     | THO complex subunit 4                                                  | 2.41  | 0.45  | 2.70  | 1.66  | 0.12  | 1.60  | -1.54 | -1.48 |
| P20065     | Thymosin beta-4                                                        | -0.27 | 0.88  | -2.37 | -0.93 | 1.57  | 0.74  | 2.95  | 0.62  |
| B7ZNL3     | Tpml protein                                                           | 0.93  | 0.32  | -0.12 | 0.06  | 0.54  | 2.03  | 0.95  | -0.23 |
| Q9WVA4     | Transgelin-2                                                           | -0.07 | -0.61 | -0.96 | 0.03  | -1.77 | -1.04 | -2.12 | -0.89 |
| Q9JKK7     | Tropomodulin-2                                                         | 0.65  | 0.63  | -2.90 | -0.08 | -2.78 | -1.25 | -3.31 | 0.80  |
| Q8BSH3     | Tropomyosin 1, alpha                                                   | 0.93  | 0.32  | -0.12 | 0.06  | 0.54  | 2.03  | 0.95  | -0.23 |
| Q9EQH3     | Vacuolar protein sorting-associated protein 35                         | -1.09 | 1.47  | -2.61 | -1.38 | -2.28 | -1.66 | -0.99 | -1.45 |
