# Supplementary material
Source: publisher site journal article supplement (doi:10.18632/aging.206374)
Supplement: Supplementary file 5 [file aging-v18i1-206374-supplementary-material-SD4.pdf]

**Supplementary Table 4. List of identified proteins (n=41) from splenic CD4<sup>+</sup> CD44<sup>+</sup> T cells (TMT- Set 2) showing RIF-INH treated young and old C57BL/6 mice with Mtb H37Rv infected controls. Y: young (4 months); O: old (19 months); T: RIF-INH treated; I: Mtb infected. See also Figure 3.**

| Accession  | Identified Protein(s) name               | log <sub>2</sub> fold change |         |         |         |         |         |         |         |
|------------|------------------------------------------|------------------------------|---------|---------|---------|---------|---------|---------|---------|
|            |                                          | YT1/YI1                      | YT2/YI1 | YT3/YI1 | YI2/YI1 | OT1/OI1 | OT2/OI1 | OT3/OI1 | OI2/OI1 |
| P50247     | Adenosylhomocysteinase                   | -1.05                        | 0.04    | -4.26   | -1.06   | -1.85   | 0.55    | 1.47    | -0.50   |
| P32020     | Sterol carrier protein 2                 | -0.88                        | -1.28   | -3.18   | -0.32   | -1.27   | -0.80   | 0.37    | -1.20   |
| A0A0G2JGN4 | Small nuclear ribonucleoprotein B        | -1.17                        | -1.59   | -2.98   | -0.86   | -1.27   | -1.28   | 1.24    | 0.24    |
| S4R1W1     | Glyceraldehyde-3-phosphate dehydrogenase | -2.30                        | -2.27   | -1.51   | -1.88   | -0.41   | -0.22   | -1.00   | 0.50    |
| O08583     | THO complex subunit 4                    | -0.53                        | -0.80   | -0.01   | 0.54    | -3.02   | -3.39   | -0.11   | -0.55   |
| P62806     | Histone H4                               | -1.29                        | -3.34   | -3.27   | -0.02   | -1.88   | -3.44   | -0.43   | -1.12   |
| Q64524     | Histone H2B type 2-E                     | -0.70                        | -1.60   | -2.52   | 0.07    | -2.39   | -4.07   | 0.24    | 0.10    |
| F8WI35     | Histone H3                               | -2.11                        | -2.57   | -2.79   | -0.18   | -1.91   | -3.82   | -1.45   | 0.48    |
| E0CZ27     | Histone H3 (Fragment)                    | -2.18                        | -2.62   | -2.80   | -0.19   | -1.86   | -3.80   | -1.44   | 0.53    |
| Q64525     | Histone H2B type 2-B                     | -1.24                        | -2.24   | -2.69   | -0.16   | -1.75   | -3.49   | -1.25   | 0.62    |
| Q8CGP2     | Histone H2B type 1-P                     | -0.96                        | -1.63   | -2.41   | 0.05    | -2.00   | -3.58   | -0.13   | 0.24    |
| Q9D2U9     | H2B.U histone 2                          | -0.94                        | -1.79   | -2.60   | 0.01    | -2.03   | -3.88   | 0.00    | 0.20    |
| E0CYR7     | H3.3 histone A (Fragment)                | -2.11                        | -2.65   | -2.87   | -0.20   | -1.71   | -3.76   | -1.34   | 0.57    |
| Q8CGP0     | Histone H2B type 3-B                     | -0.94                        | -1.79   | -2.60   | 0.01    | -2.03   | -3.88   | 0.00    | 0.20    |
| P70696     | Histone H2B type 1-A                     | -0.96                        | -1.65   | -2.36   | 0.04    | -1.95   | -3.53   | -0.17   | 0.25    |
| A0A8I4SYN6 | Histone H3                               | -2.00                        | -2.43   | -2.66   | -0.15   | -1.51   | -3.78   | -1.50   | 0.36    |
| P27661     | Histone H2AX                             | -2.19                        | -2.60   | -2.65   | -0.37   | -1.17   | -3.93   | -0.60   | 0.91    |
| P07309     | Transthyretin                            | 0.39                         | 0.03    | 0.55    | -0.69   | 1.41    | 1.74    | 0.88    | -0.61   |
| V9GX81     | Maestro heat-like repeat family member 6 | -0.35                        | -0.12   | -0.64   | 0.21    | 0.04    | -0.17   | -1.56   | -0.12   |
| P15864     | Histone H1.2                             | -0.99                        | -0.48   | -1.84   | 0.27    | -2.37   | -4.25   | -3.62   | 0.06    |
| Q07133     | Histone H1t                              | -1.41                        | -0.61   | -2.62   | 0.14    | -2.12   | -5.30   | -4.39   | 0.09    |
| P43275     | Histone H1.1                             | -0.49                        | -0.29   | -1.86   | 0.56    | -1.61   | -3.81   | -4.33   | 0.12    |
| G3UWL7     | Histone H2A                              | -2.03                        | -2.53   | -2.37   | -0.67   | 0.52    | -4.01   | -0.79   | 1.19    |

|            |                                                   |       |       |       |       |       |       |       |       |
|------------|---------------------------------------------------|-------|-------|-------|-------|-------|-------|-------|-------|
| B2RY04     | Dedicator of cytokinesis protein 5                | -0.06 | -0.51 | 0.80  | 0.31  | 2.06  | 2.02  |       | -0.65 |
| A8DUK4     | Beta-globin                                       | 6.13  | 5.47  | 3.53  | -0.15 | -1.76 | 1.11  | 2.33  | -1.13 |
| A0A0U1RQ96 | Actin, gamma 2, smooth muscle, enteric (Fragment) | -4.50 | -4.81 | -4.38 | -2.37 | -4.75 | -3.76 | -3.22 | 0.85  |
| Q8BFZ3     | Beta-actin-like protein 2                         | -3.66 | -3.91 | -4.29 | -2.11 | -3.98 | -3.68 | -2.62 | 0.79  |
| E9Q5F4     | Actin, beta (Fragment)                            | -3.91 | -3.75 | -1.03 | -1.72 | -2.24 | -3.14 | -2.50 | 0.38  |
| E9Q1F2     | Actin, beta                                       | -4.02 | -3.82 | -0.94 | -1.72 | -2.21 | -3.12 | -2.55 | 0.36  |
| P63268     | Actin, gamma-enteric smooth muscle                | -3.67 | -3.60 | -0.67 | -1.64 | -2.18 | -3.22 | -2.43 | 0.21  |
| A0A1D5RM20 | Actin alpha 1, skeletal muscle (Fragment)         | -3.56 | -3.46 | -0.41 | -1.55 | -1.96 | -3.15 | -2.33 | 0.10  |
| F6WX90     | Actin, alpha, cardiac muscle 1 (Fragment)         | -3.67 | -3.53 | -0.28 | -1.55 | -1.90 | -3.13 | -2.39 | 0.06  |
| A0A338P692 | Alpha-2-HS-glycoprotein (Fragment)                | -0.79 | -0.31 | -0.47 | 0.10  | 0.78  | 1.85  | -3.15 | -0.10 |
| Q6NS59     | Protein FAM135A                                   | 0.34  | 0.44  | 0.37  | 0.42  | 0.90  | 1.98  | -4.33 | -0.17 |
| Q3T052     | Inter-alpha-trypsin inhibitor heavy chain H4      | -0.57 | -0.34 | -0.06 | 0.09  | 1.17  | 0.37  | -3.07 | 0.25  |
| P06467     | Hemoglobin subunit zeta                           | -0.57 | -2.06 | -3.20 | -0.70 | 0.75  | 3.25  | -0.33 | -0.41 |
| F7CJN9     | Transferrin (Fragment)                            | -0.28 | 0.59  | 0.74  | 0.09  | 2.19  | 2.57  | -2.00 | -0.21 |
| Q921I1     | Serotransferrin                                   | 0.40  | 0.87  | 0.52  | 0.09  | 1.96  | 1.85  | -0.36 | -0.45 |
| P57016     | Ladinin-1                                         | 0.74  | 0.77  | 0.81  | -0.54 | 2.30  | 1.96  | 1.31  | -1.21 |
| P05202     | Aspartate aminotransferase, mitochondrial         | -0.63 | 0.50  | 1.24  | 0.58  | 3.23  | 2.87  | 3.35  | -0.24 |
| D3YYR8     | Transferrin (Fragment)                            | 2.24  | 1.89  | -0.89 | 0.07  | 1.50  | -0.47 | 1.17  | -0.97 |
